# Supplementary material for: Specific miRNA and Gene Deregulation Characterize the Increased Angiogenic Remodeling of Thoracic Aneurysmatic Aortopathy in Marfan Syndrome
Source: PubMed Central journal article supplement (PMC7555983; doi:10.3390/ijms21186886), 2020-09-19
Supplement: ijms-21-06886-s001.pdf [file ijms-21-06886-s001.pdf]

non-MFS TAA

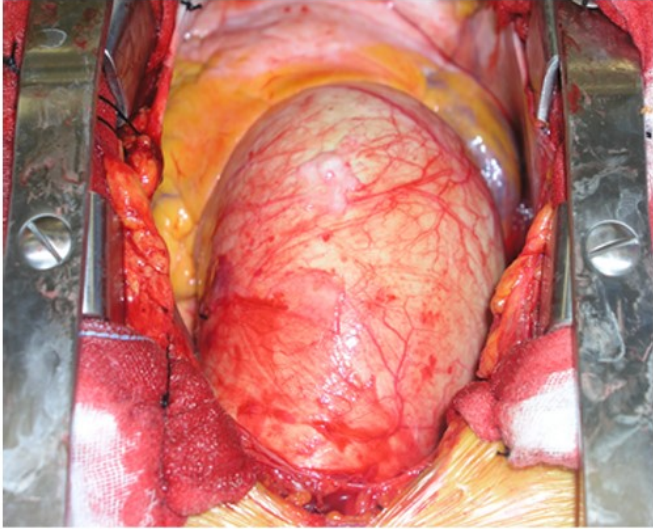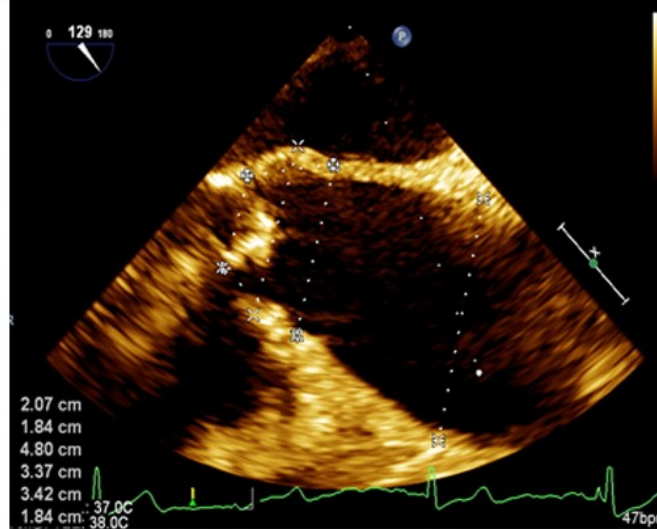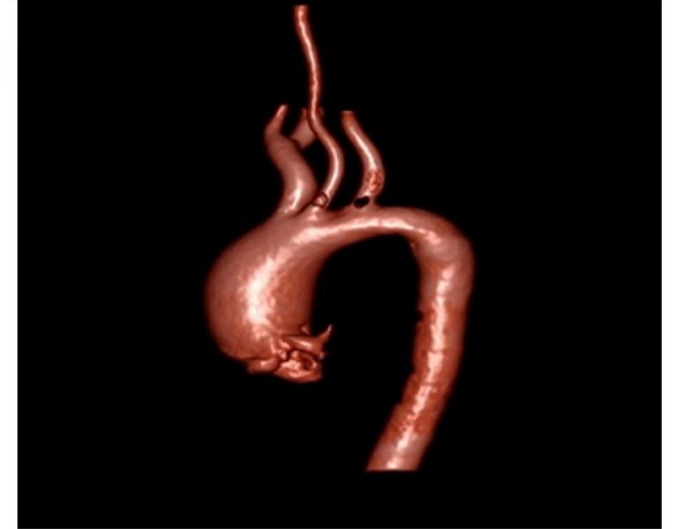

MFS TAA

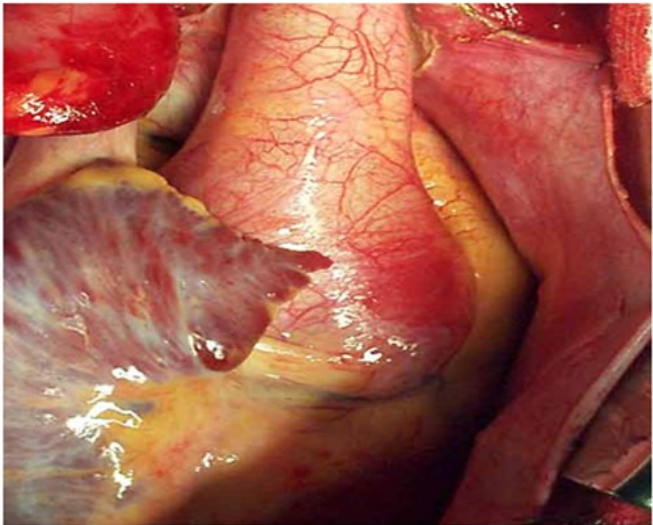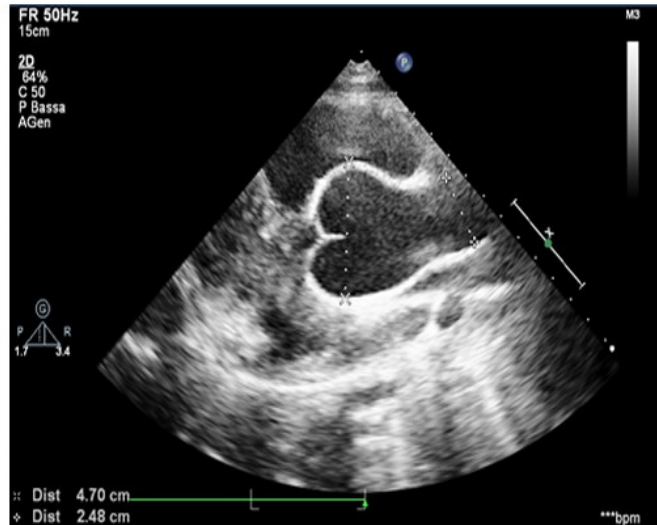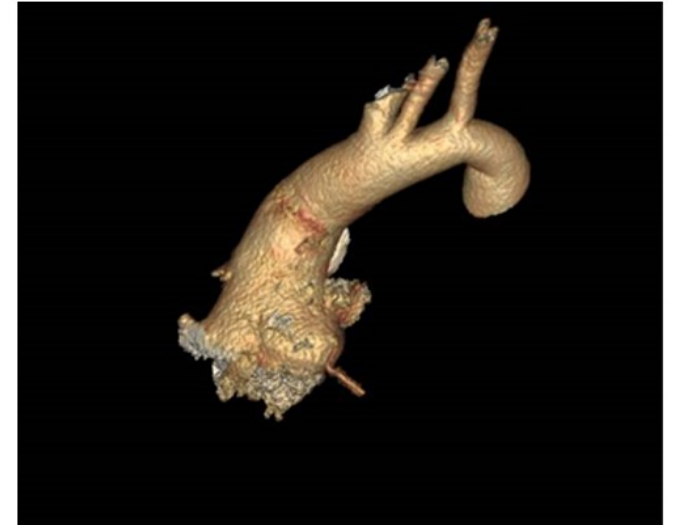

Supplemental Figure I

**Control aorta**

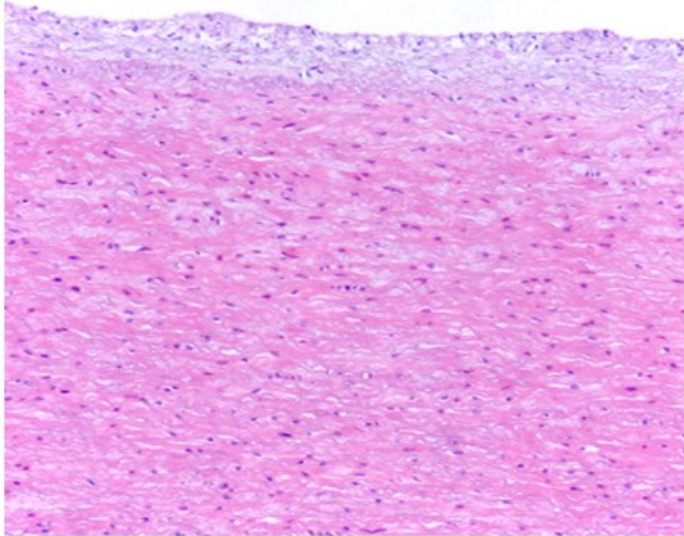

**non-MFS TAA**

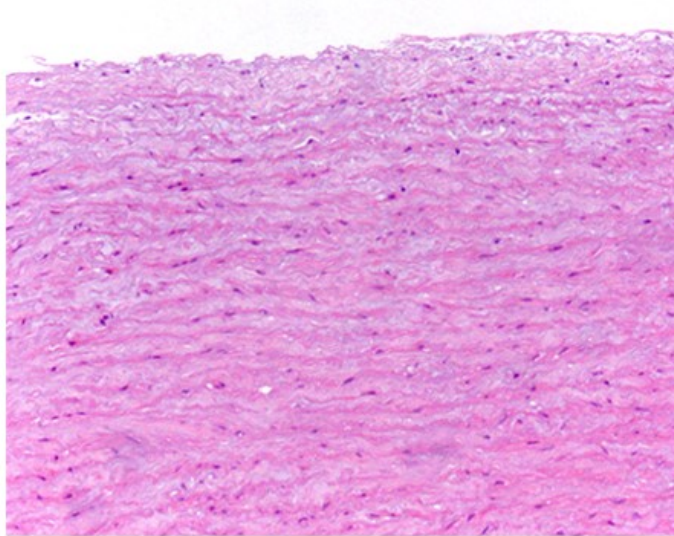

**MFS TAA**

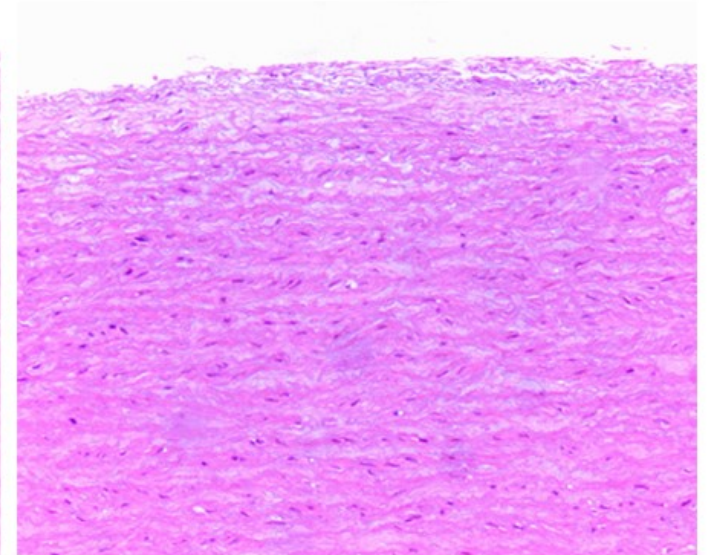

**Supplemental Figure II**

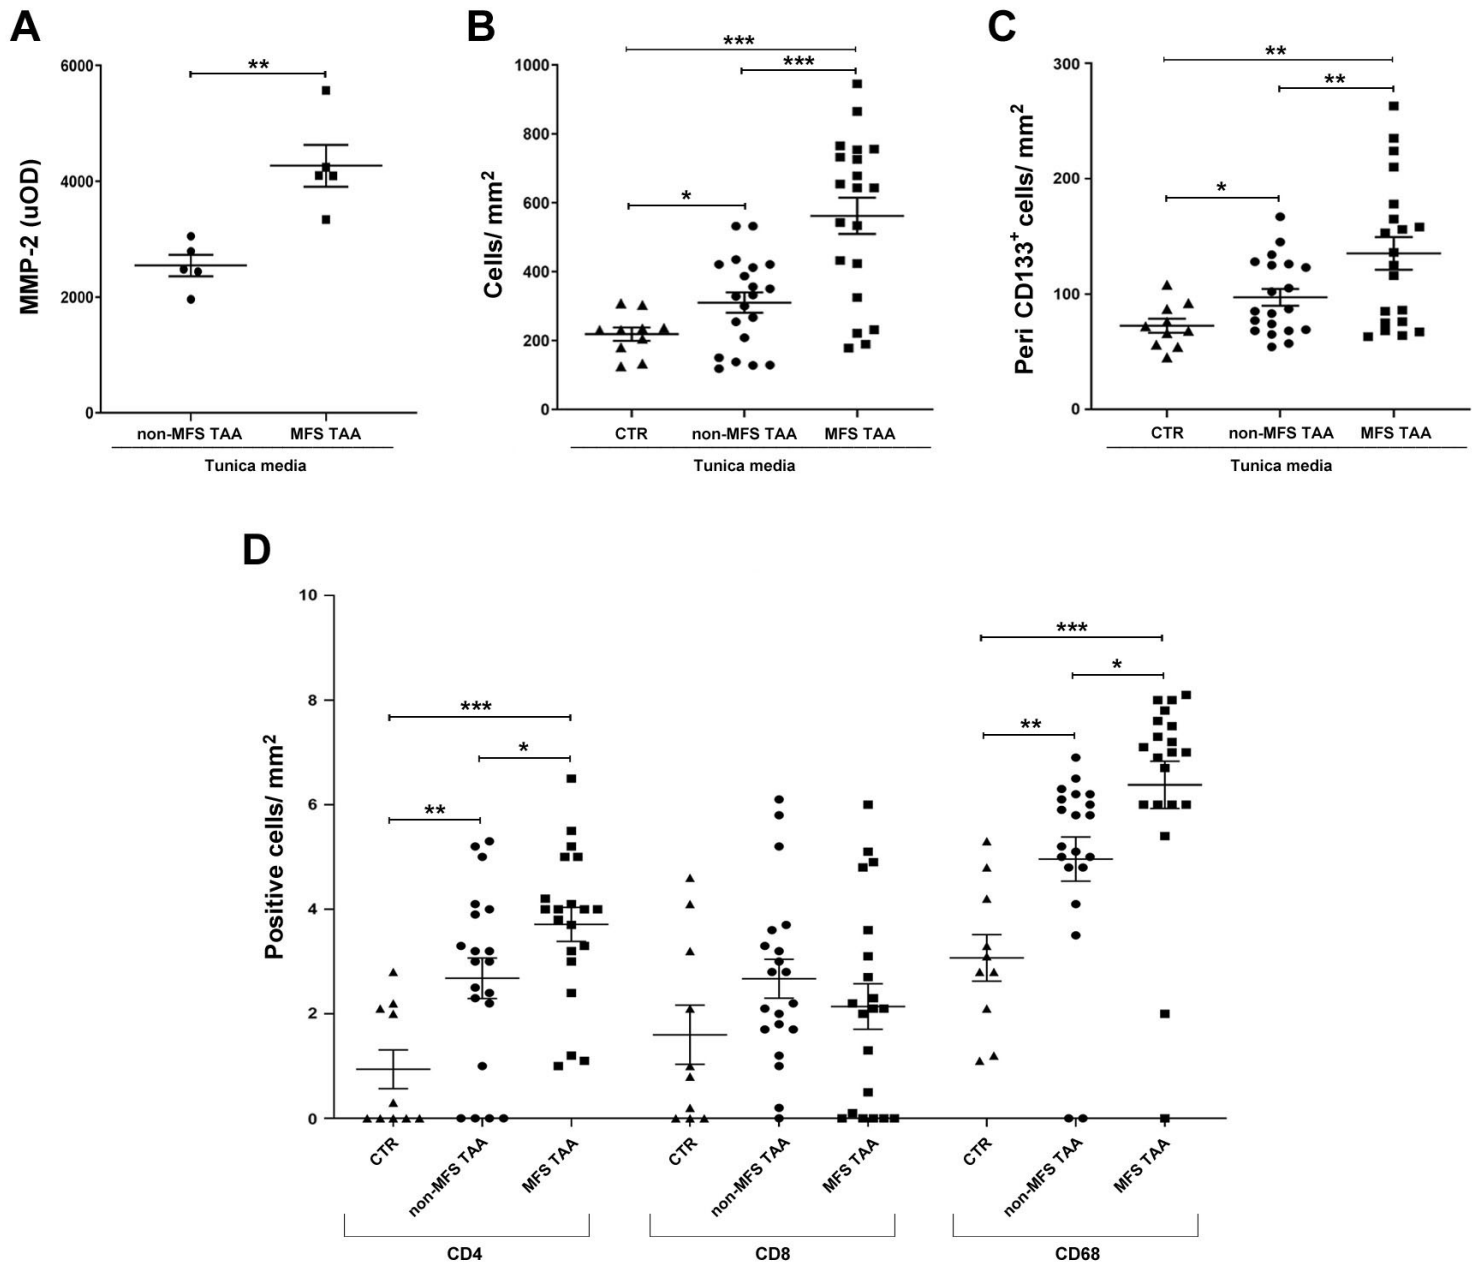

Supplemental Figure III



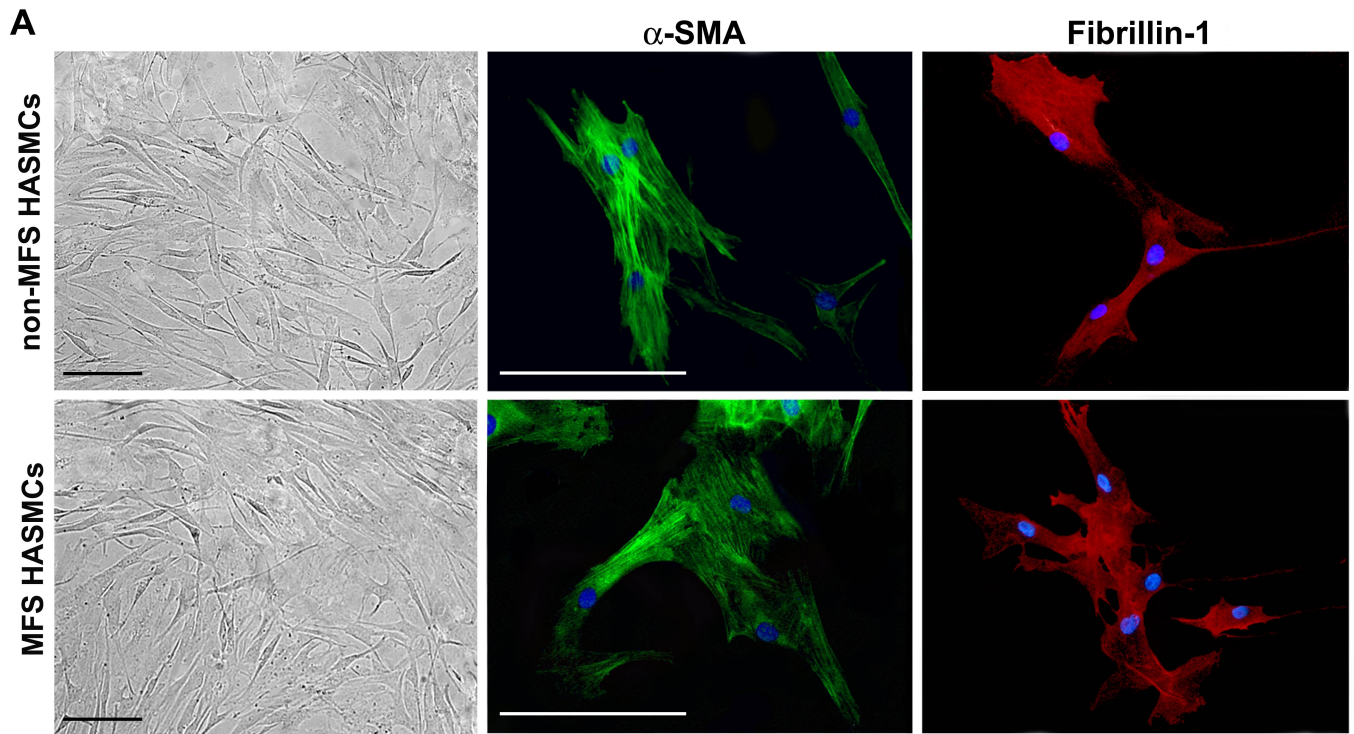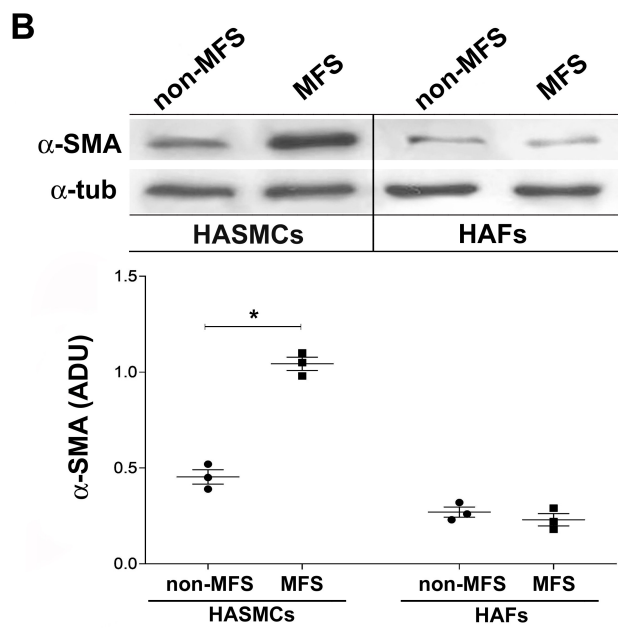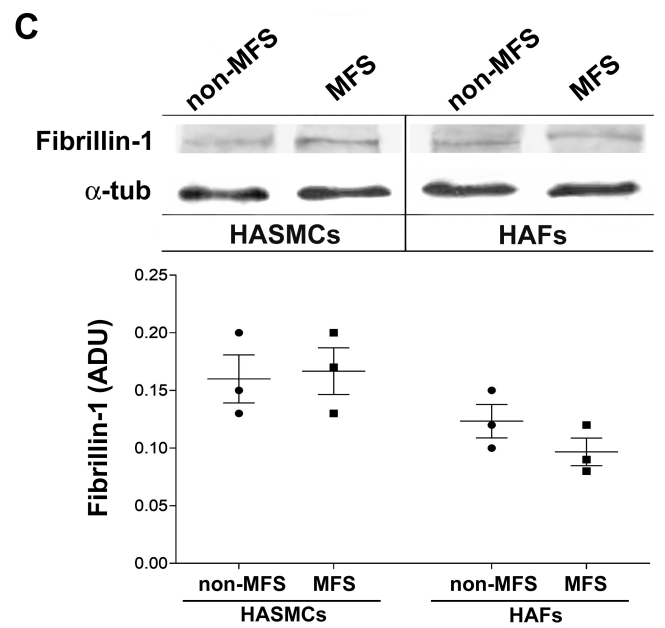

**Supplemental Figure IV**

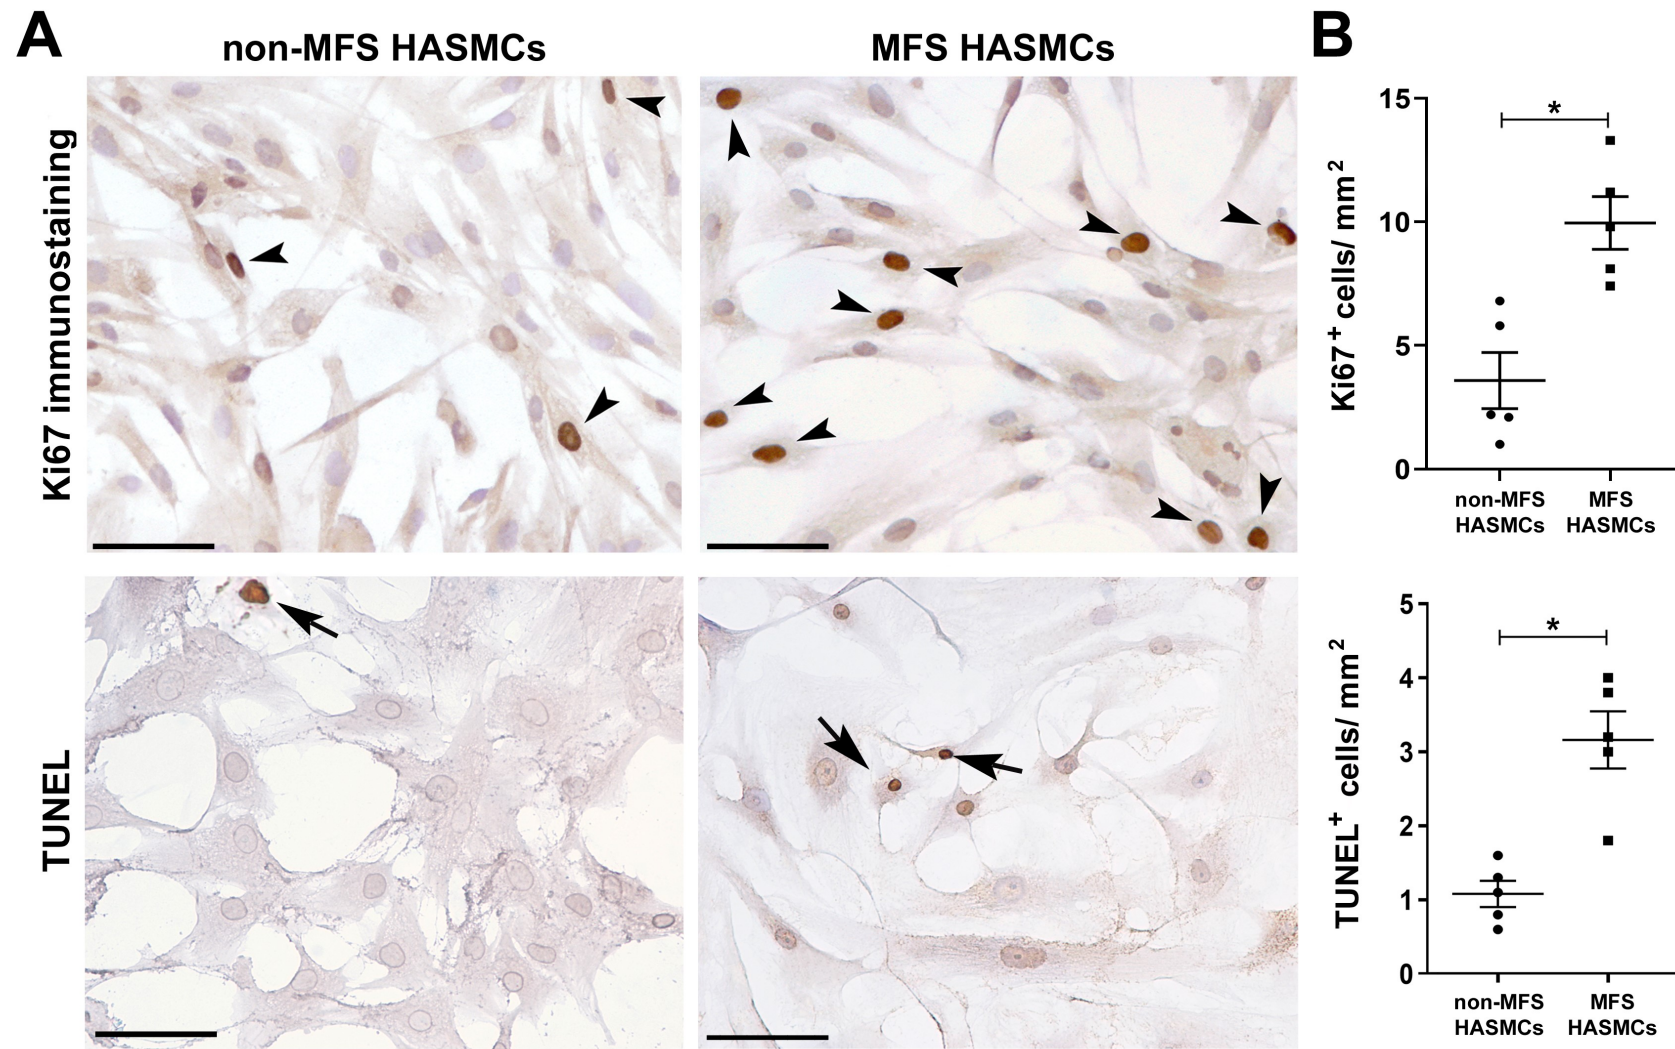

Supplemental Figure V

### Gene Expression MFS TAA vs non-MFS TAA

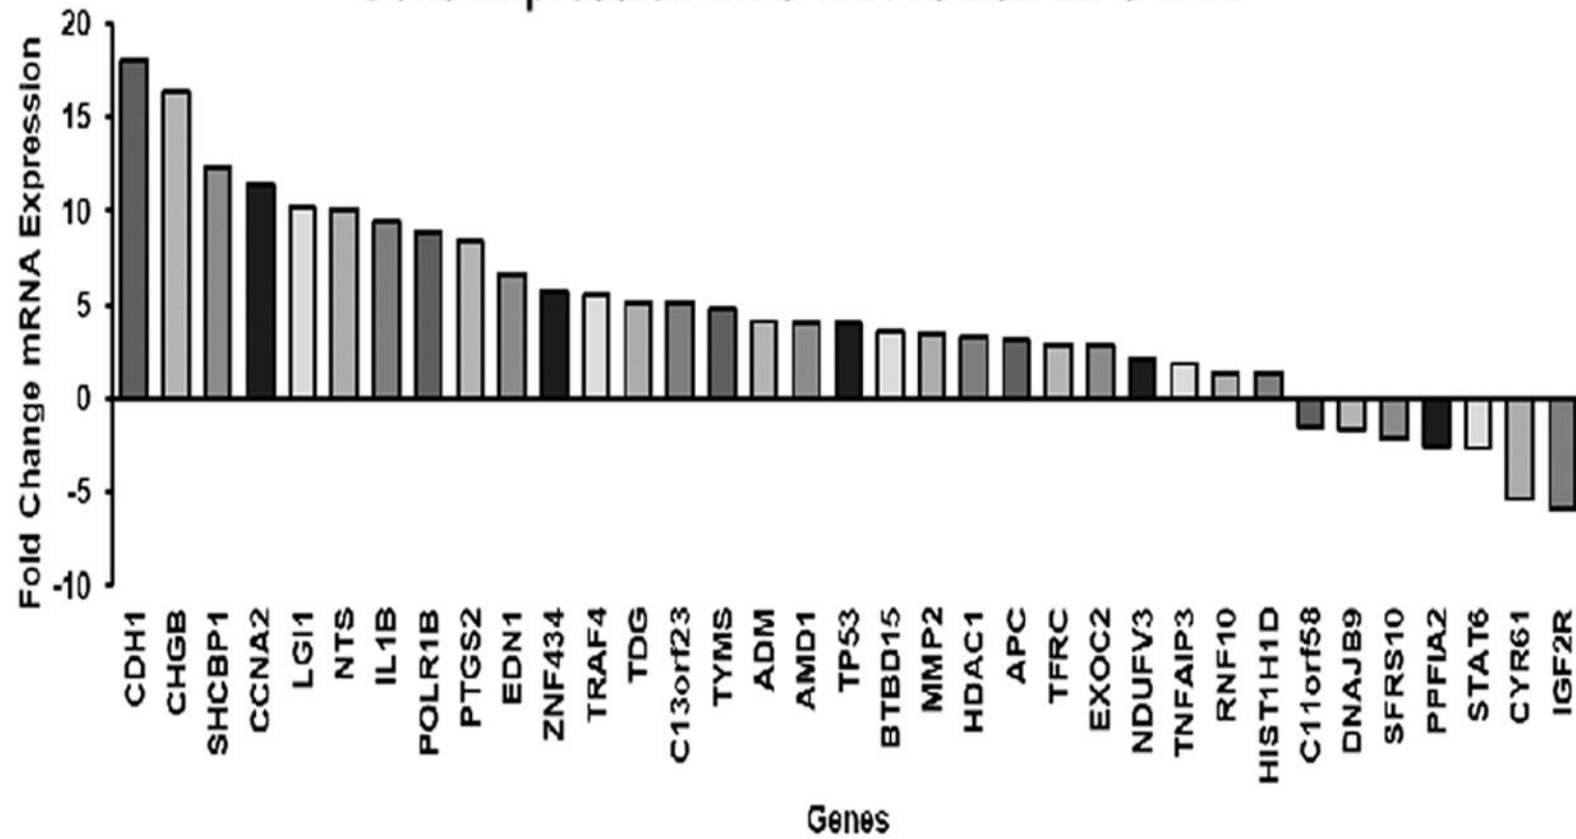

Supplemental Figure VI

## **Supplemental Figure legend**

**Supplemental Figure I. Macroscopic, ecocolor Doppler and computed tomography vision of MFS and non-MFS TAA.** In the left side, intraoperative view of ascending aortic aneurysm associated to non-MFS and MFS aorta; in the middle, ecocolor Doppler evaluation; in the right side, computed Tomography view of ascending aortic aneurysm. Abbreviations: MFS, Marfan syndrome; non-MFS, non Marfan syndrome; TAA, thoracic aorta aneurysm.

**Supplemental Figure II. Histological analysis of control aorta, MFS and non-MFS TAA.** Representative aortic media sections stained with Haematoxylin&Eosin (H&E) show accumulation of basophilic material in the intimal and medial tunica of non-MFS and MFS TAA compared with control. Bar graphs of morphometric evaluations concerning intimal and medial thickness. Abbreviations: MFS, Marfan syndrome; non-MFS, non Marfan syndrome; TAA, thoracic aorta aneurysm.

**Supplemental Figure III. MMP2 activity, cellularity, vascular precursors and inflammatory recruitment in the tunica media of MFS TAA, non-MFS TAA and control aorta.** (A) Densitometric analysis in uOD (unit optical density) values of MMP-2 gelatinase activity (N=5/group). (B) Bar graph shows the cellularity (number of cells/ mm<sup>2</sup>) in the tunica media of MFS TAA, non-MFS TAA and control aorta. (C) Bar graph shows perivascular CD133<sup>+</sup> cell density (number of cells/ mm<sup>2</sup>) in the tunica media of MFS TAA, non-MFS TAA and control aorta. (D) Semiquantitative evaluation of inflammatory cell infiltrate in outer media and adventitia documents the increase of CD4<sup>+</sup> and CD68<sup>+</sup>. MFS TAA (N=20), non-MFS TAA (N=20) and control aorta (N=10). Average are reported as means  $\pm$  SEM; \**P*< 0.05; \*\**P*<0.01; \*\*\**P*<0.001; estimated by *t*-test. Abbreviations: uOD, unit optical density; MFS, Marfan syndrome; non-MFS, non Marfan syndrome; TAA, thoracic aorta aneurysm.

**Supplemental Figure IV. Morphological and phenotypic features of cultured HASMCs from non-MFS and MFS TAA *in vitro*.** (A) Phase contrast micrographs at third passage of

cultured HASMCs from non-MFS and MFS TAA; scale bar =150  $\mu\text{m}$ . Immunofluorescence staining shows  $\alpha$ -SMA and fibrillin-1 expression in both cultures; scale bar =100  $\mu\text{m}$ . (B) Representative blots and bar graphs of  $\alpha$ -SMA and fibrillin-1 expression in cultured HASMCs and HAFs from non-MFS and MFS TAA (N=3/group). Average are reported as means  $\pm$  SEM; \* $P$ < 0.001; estimated by  $t$ -test. Abbreviations: HASMCs, human aortic medial-derived smooth muscle cells; HAFs, human aortic fibroblasts; MFS, Marfan syndrome; non-MFS, non Marfan syndrome; TAA, thoracic aorta aneurysms;  $\alpha$ -SMA,  $\alpha$ -smooth muscle actin;  $\alpha$ -tub,  $\alpha$ -tubulin; ADU, arbitrary densitometry units.

**Supplemental Figure V. Increased proliferation and apoptosis characterize cultured HASMCs from MFS TAA.** (A) Representative images and (B) semiquantitative evaluation of Ki67 immunocytochemistry (dark brown nuclei, arrowheads) and *In situ* end-labeling of DNA fragments by TUNEL assay (dark brown nuclei, arrows) in non-MFS and MFS HASMCs cultures (N=5/group). Scale bar equals to 100 $\mu\text{m}$ . Scale bar equals to 50 $\mu\text{m}$ . Average are reported as means  $\pm$  SEM; \*  $P$ <0.01; estimated by  $t$ -test.

**Supplemental Figure VI. Gene deregulation in MFS TAA media tissue.** Gene deregulation in MFS TAA expressed as fold change of non-MFS TAA (MFS TAA, N=4; non-MFS TAA, N=2).



**Supplemental Table 1. Up and down-regulated miRNAs in MFS TAA.**

| <b>miRs</b>                  | <b>Fold Change</b> |
|------------------------------|--------------------|
| hsa-miR-632                  | 13,51              |
| hsa-let-7f-5p                | -6,82              |
| hsa-miR-101-3p               | -7,47              |
| hsa-miR-125a-3p              | -2,91              |
| hsa-miR-1                    | -3,64              |
| hsa-miR-1537                 | -8,52              |
| hsa-miR-199b-5p              | -75,42             |
| hsa-miR-217                  | -4,19              |
| hsa-miR-25-3p                | -2,76              |
| hsa-miR-27a-3p               | -83,49             |
| hsa-miR-27b-3p               | -8,03              |
| hsa-miR-28-3p                | -2,82              |
| hsa-miR-29c-3p               | -18,77             |
| hsa-miR-302d-3p              | -2,40              |
| hsa-miR-30d-5p               | -33,40             |
| hsa-miR-338-3p               | -3,93              |
| hsa-miR-378a-3p+hsa-miR-378i | -14,08             |
| hsa-miR-4461                 | -24,91             |
| hsa-miR-515-5p               | -5,05              |
| hsa-miR-525-3p               | -11,36             |
| hsa-miR-592                  | -9,18              |
| hsa-miR-614                  | -3,69              |
| hsa-miR-890                  | -12,61             |
| hsa-miR-26a-5p               | -13,07             |
| hsa-miR-29b-3p               | -40,96             |
| hsa-miR-145-5p               | -3,82              |

**Supplemental Table 2. Up and down-regulated genes in MFS compared to non-MFS TAA.**

| <b>Upregulated genes</b> |                  |                    |
|--------------------------|------------------|--------------------|
| <b>Gene Name</b>         | <b>Accession</b> | <b>Fold Change</b> |
| CDH1                     | NM_004360.2      | 17,98              |
| CHGB                     | NM_001819.1      | 16,45              |
| SHCBP1                   | NM_024745.2      | 12,38              |
| CCNA2                    | NM_001237.2      | 11,44              |
| LGI1                     | NM_005097.1      | 10,25              |
| NTS                      | NM_006183.3      | 10,17              |
| IL1B                     | NM_000576.2      | 9,47               |
| POLR1B                   | NM_019014.3      | 8,89               |
| PTGS2                    | NM_000963.1      | 8,47               |
| EDN1                     | NM_001955.2      | 6,64               |
| ZNF434                   | NM_017810.2      | 5,75               |
| TRAF4                    | NM_004295.2      | 5,52               |
| TDG                      | NM_003211.3      | 5,17               |
| C13orf23                 | NM_025138.2      | 5,12               |
| TYMS                     | NM_001071.1      | 4,76               |
| ADM                      | NM_001124.1      | 4,12               |
| AMD1                     | NM_001634.4      | 4,03               |
| TP53                     | NM_000546.2      | 4,03               |
| BTBD15                   | NM_014155.2      | 3,56               |
| MMP2                     | NM_004530.2      | 3,5                |
| HDAC1                    | NM_004964.2      | 3,23               |
| APC                      | NM_000038.3      | 3,1                |
| TFRC                     | NM_003234.1      | 2,89               |
| EXOC2                    | NM_018303.4      | 2,82               |
| NDUFV3                   | NM_021075.3      | 2,1                |
| TNFAIP3                  | NM_006290.2      | 1,87               |
| RNF10                    | NM_014868.3      | 1,43               |
| HIST1H1D                 | NM_005320.2      | 1,41               |

| <b>Downregulated genes</b> |                  |                    |
|----------------------------|------------------|--------------------|
| <b>Gene Name</b>           | <b>Accession</b> | <b>Fold Change</b> |
| C11orf58                   | NM_014267.3      | -1,54              |
| DNAJB9                     | NM_012328.1      | -1,57              |
| SFRS10                     | NM_004593.1      | -2,21              |
| PPFIA2                     | NM_003625.2      | -2,51              |
| STAT6                      | NM_003153.3      | -2,65              |
| CYR61                      | NM_001554.3      | -5,35              |
| IGF2R                      | NM_000876.1      | -5,97              |

**Supplemental Table 3. Up and down-regulated genes in MFS compared to non-MFS TAA.**

| <b>Upregulated genes</b> |                  |                    |
|--------------------------|------------------|--------------------|
| <b>Gene Name</b>         | <b>Accession</b> | <b>Fold Change</b> |
| CDH1                     | NM_004360.2      | 17,98              |
| CHGB                     | NM_001819.1      | 16,45              |
| SHCBP1                   | NM_024745.2      | 12,38              |
| CCNA2                    | NM_001237.2      | 11,44              |
| LGI1                     | NM_005097.1      | 10,25              |
| NTS                      | NM_006183.3      | 10,17              |
| IL1B                     | NM_000576.2      | 9,47               |
| POLR1B                   | NM_019014.3      | 8,89               |
| PTGS2                    | NM_000963.1      | 8,47               |
| EDN1                     | NM_001955.2      | 6,64               |
| ZNF434                   | NM_017810.2      | 5,75               |
| TRAF4                    | NM_004295.2      | 5,52               |
| TDG                      | NM_003211.3      | 5,17               |
| C13orf23                 | NM_025138.2      | 5,12               |
| TYMS                     | NM_001071.1      | 4,76               |
| ADM                      | NM_001124.1      | 4,12               |
| AMD1                     | NM_001634.4      | 4,03               |
| TP53                     | NM_000546.2      | 4,03               |
| BTBD15                   | NM_014155.2      | 3,56               |
| MMP2                     | NM_004530.2      | 3,5                |
| HDAC1                    | NM_004964.2      | 3,23               |
| APC                      | NM_000038.3      | 3,1                |
| TFRC                     | NM_003234.1      | 2,89               |
| EXOC2                    | NM_018303.4      | 2,82               |
| NDUFV3                   | NM_021075.3      | 2,1                |
| TNFAIP3                  | NM_006290.2      | 1,87               |
| RNF10                    | NM_014868.3      | 1,43               |
| HIST1H1D                 | NM_005320.2      | 1,41               |

| <b>Downregulated genes</b> |                  |                    |
|----------------------------|------------------|--------------------|
| <b>Gene Name</b>           | <b>Accession</b> | <b>Fold Change</b> |
| C11orf58                   | NM_014267.3      | -1,54              |
| DNAJB9                     | NM_012328.1      | -1,57              |
| SFRS10                     | NM_004593.1      | -2,21              |
| PPFIA2                     | NM_003625.2      | -2,51              |
| STAT6                      | NM_003153.3      | -2,65              |
| CYR61                      | NM_001554.3      | -5,35              |
| IGF2R                      | NM_000876.1      | -5,97              |
